# Supplementary material for: Analysis of n-hexane, 1-hexene, cyclohexane and cyclohexene catalytic cracking over HZSM-5 zeolites: effects of molecular structure
Source: Royal Society of Chemistry journal article supplement (doi:10.1039/d1re00532d), 2022-01-01
Supplement: d1re00532d1.pdf [file d1re00532d1.pdf]

**Supporting information**

**Analysis of n-hexane, 1-hexene, cyclohexane and cyclohexene catalytic cracking over HZSM-5 zeolites: Effects of molecular structure**

Zhenzhou Ma <sup>a</sup>, Xu Hou <sup>a,b,\*</sup>, Bochong Chen <sup>a</sup>, Liu Zhao <sup>a</sup>, Enxian Yuan <sup>c,\*</sup>, Tingting Cui <sup>d,\*</sup>

<sup>a</sup> School of Chemical Engineering, Changchun University of Technology, Changchun, Jilin, PR China

<sup>b</sup> Advanced Institute of Materials Science, Changchun University of Technology, Changchun, Jilin, PR China

<sup>c</sup> School of Chemistry and Chemical Engineering, Yangzhou University, Yangzhou, Jiangsu, PR China

<sup>d</sup> Department of Chemistry, Tsinghua University, Beijing, PR China

\* Corresponding author:

Xu Hou: [houx@ccut.edu.cn](mailto:houx@ccut.edu.cn)

Enxian Yuan: [exyuan@yzu.edu.cn](mailto:exyuan@yzu.edu.cn)

Tingting Cui: [ttcui@mail.tsinghua.edu.cn](mailto:ttcui@mail.tsinghua.edu.cn)

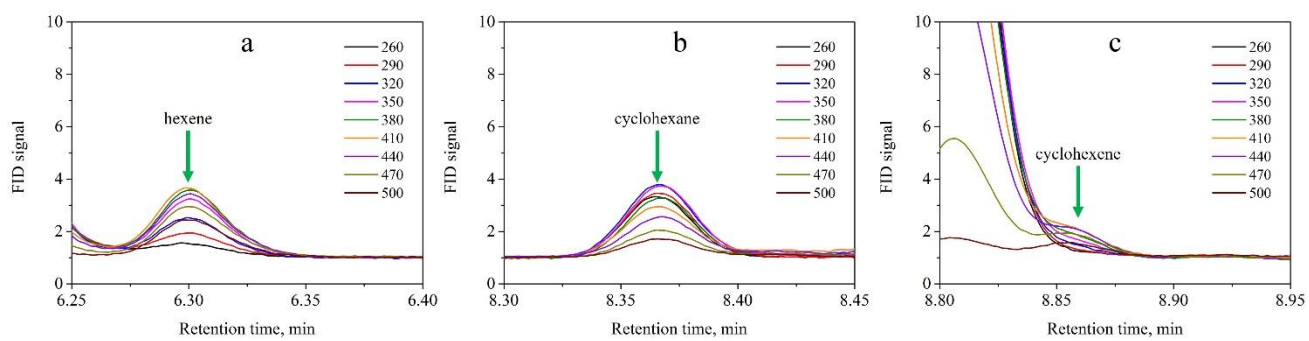

Figure S1 Chromatograms for the detection of (a) hexene (RT=6.30 min), (b) cyclohexane (RT=8.37 min), and (c) cyclohexene (RT=8.86 min) in n-hexane catalytic cracking.

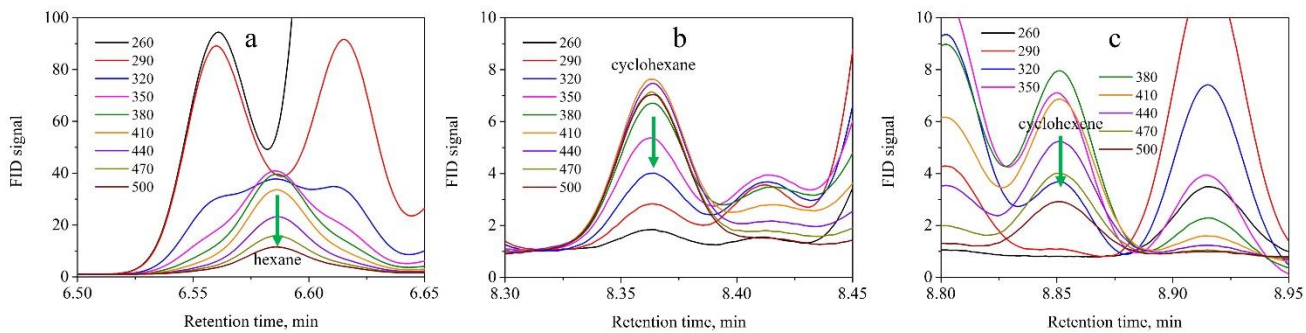

Figure S2 Chromatograms for the detection of (a) hexane (RT=6.58 min), (b) cyclohexane (RT=8.37 min), and (c) cyclohexene (RT=8.86 min) in 1-hexene catalytic cracking.

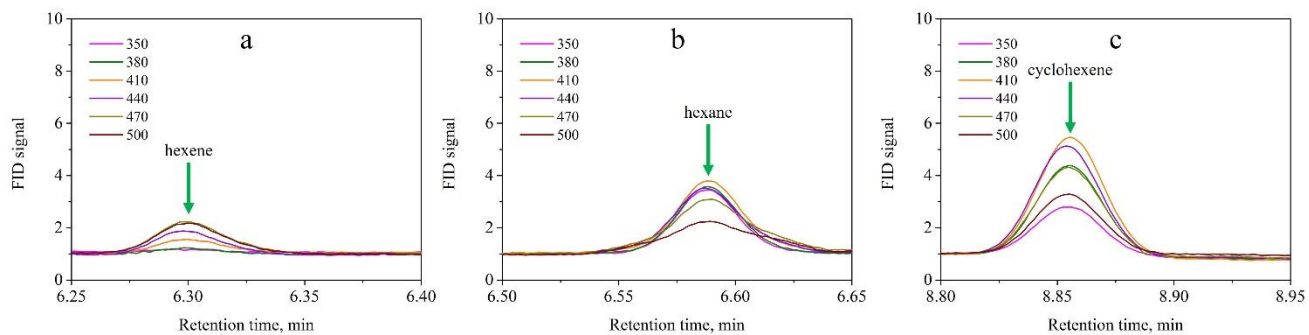

Figure S3 Chromatograms for the detection of (a) hexene (RT=6.30 min), (b) hexane (RT=6.58 min), and (c) cyclohexene (RT=8.86 min) in cyclohexane catalytic cracking.

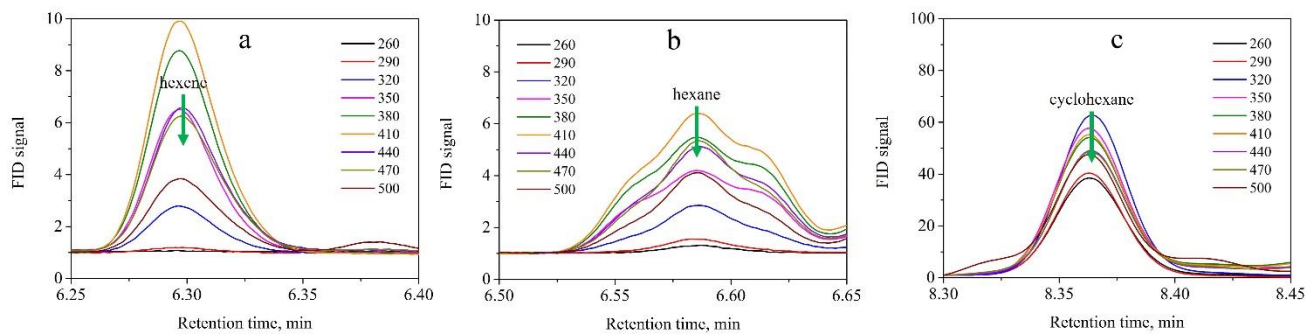

Figure S4 Chromatograms for the detection of (a) hexene (RT=6.30 min), (b) hexane (RT=6.58 min), and (c) cyclohexane (RT=8.37 min) in cyclohexene catalytic cracking.

Table S1 Effects of reaction temperature on the product selectivity (wt%) in n-hexane catalytic cracking over HZSM-5 zeolites.

| T, °C | Methane | Ethane | Propane | n-Butane | iso-Butane | n-Pentane | Ethene | Propene | 1-Butene | 2-Butene | iso-Butene | Benzene | Toluene | Ethylbenzene | Xylene |
|-------|---------|--------|---------|----------|------------|-----------|--------|---------|----------|----------|------------|---------|---------|--------------|--------|
| 260   | 0.0     | 0.0    | 3.8     | 9.2      | 10.1       | 3.8       | 0.0    | 0.0     | 0.0      | 0.0      | 0.0        | 0.0     | 0.0     | 0.0          | 0.0    |
| 290   | 0.0     | 0.0    | 13.0    | 13.2     | 11.7       | 9.3       | 0.0    | 5.6     | 0.0      | 0.0      | 5.5        | 0.0     | 0.0     | 0.0          | 0.0    |
| 320   | 0.0     | 0.0    | 19.0    | 16.5     | 12.1       | 9.0       | 0.0    | 7.5     | 0.0      | 2.4      | 5.7        | 0.0     | 0.0     | 0.0          | 0.0    |
| 350   | 0.0     | 0.0    | 24.7    | 16.6     | 10.6       | 6.6       | 2.9    | 9.6     | 1.1      | 4.4      | 5.6        | 0.0     | 0.0     | 0.0          | 0.5    |
| 380   | 0.0     | 1.0    | 29.9    | 15.0     | 9.1        | 4.2       | 4.5    | 11.5    | 1.1      | 4.4      | 5.1        | 0.0     | 1.0     | 0.0          | 1.4    |
| 410   | 0.0     | 1.8    | 33.6    | 12.8     | 7.9        | 2.6       | 6.2    | 13.3    | 1.1      | 4.2      | 4.5        | 0.0     | 1.7     | 0.0          | 1.9    |
| 440   | 0.5     | 3.1    | 34.5    | 10.2     | 6.6        | 1.5       | 8.1    | 14.9    | 1.1      | 4.0      | 4.1        | 0.5     | 2.5     | 0.0          | 2.4    |
| 470   | 1.0     | 5.1    | 32.3    | 7.7      | 5.4        | 0.8       | 10.6   | 16.4    | 1.0      | 3.7      | 3.6        | 0.9     | 4.0     | 0.0          | 3.5    |
| 500   | 1.8     | 7.0    | 28.0    | 5.8      | 4.6        | 0.4       | 13.4   | 17.2    | 1.0      | 3.3      | 3.0        | 1.9     | 6.4     | 0.0          | 4.0    |

Table S2 Effects of reaction temperature on the product yield (wt%) in n-hexane catalytic cracking over HZSM-5 zeolites.

| T, °C | Methane | Ethane | Propane | n-Butane | iso-Butane | n-Pentane | Ethene | Propene | 1-Butene | 2-Butene | iso-Butene | Benzene | Toluene | Ethylbenzene | Xylene |
|-------|---------|--------|---------|----------|------------|-----------|--------|---------|----------|----------|------------|---------|---------|--------------|--------|
| 260   | 0.0     | 0.0    | 0.1     | 0.3      | 0.3        | 0.1       | 0.0    | 0.0     | 0.0      | 0.0      | 0.0        | 0.0     | 0.0     | 0.0          | 0.0    |
| 290   | 0.0     | 0.0    | 0.7     | 0.7      | 0.7        | 0.5       | 0.0    | 0.3     | 0.0      | 0.0      | 0.3        | 0.0     | 0.0     | 0.0          | 0.0    |
| 320   | 0.0     | 0.0    | 2.2     | 1.9      | 1.4        | 1.0       | 0.0    | 0.9     | 0.0      | 0.3      | 0.7        | 0.0     | 0.0     | 0.0          | 0.0    |
| 350   | 0.0     | 0.0    | 5.1     | 3.5      | 2.2        | 1.4       | 0.6    | 2.0     | 0.2      | 0.9      | 1.2        | 0.0     | 0.0     | 0.0          | 0.1    |
| 380   | 0.0     | 0.3    | 10.9    | 5.4      | 3.3        | 1.5       | 1.6    | 4.2     | 0.4      | 1.6      | 1.9        | 0.0     | 0.4     | 0.0          | 0.5    |
| 410   | 0.0     | 0.9    | 17.8    | 6.8      | 4.2        | 1.4       | 3.3    | 7.0     | 0.6      | 2.2      | 2.4        | 0.0     | 0.9     | 0.0          | 1.0    |
| 440   | 0.3     | 2.1    | 23.3    | 6.9      | 4.4        | 1.0       | 5.5    | 10.1    | 0.7      | 2.7      | 2.7        | 0.3     | 1.7     | 0.0          | 1.6    |
| 470   | 0.8     | 4.0    | 25.6    | 6.1      | 4.3        | 0.6       | 8.4    | 12.9    | 0.8      | 2.9      | 2.8        | 0.7     | 3.1     | 0.0          | 2.7    |
| 500   | 1.6     | 6.2    | 24.7    | 5.1      | 4.0        | 0.4       | 11.8   | 15.1    | 0.8      | 2.9      | 2.7        | 1.7     | 5.6     | 0.0          | 3.5    |

Table S3 Effects of time on stream on the product selectivity (wt%) in n-hexane catalytic cracking over HZSM-5 zeolites at 550 °C.

| TOS, h | Methane | Ethane | Propane | n-Butane | iso-Butane | n-Pentane | Ethene | Propene | 1-Butene | 2-Butene | iso-Butene | Benzene | Toluene | Ethylbenzene | Xylene |
|--------|---------|--------|---------|----------|------------|-----------|--------|---------|----------|----------|------------|---------|---------|--------------|--------|
| 0.5    | 4.4     | 7.2    | 18.1    | 3.3      | 2.1        | 0.0       | 17.0   | 15.8    | 0.7      | 2.3      | 2.0        | 8.6     | 12.4    | 0.5          | 5.2    |
| 1      | 4.0     | 7.4    | 18.0    | 3.3      | 2.1        | 0.0       | 18.0   | 17.0    | 0.8      | 2.4      | 2.1        | 7.9     | 11.2    | 0.5          | 4.7    |
| 1.5    | 4.0     | 7.4    | 17.5    | 3.2      | 2.1        | 0.0       | 18.5   | 17.6    | 0.8      | 2.5      | 2.2        | 7.9     | 11.0    | 0.4          | 4.5    |
| 2      | 4.0     | 7.4    | 17.6    | 3.3      | 2.1        | 0.0       | 18.5   | 17.8    | 0.8      | 2.5      | 2.2        | 7.7     | 10.8    | 0.5          | 4.5    |
| 2.5    | 4.0     | 7.4    | 17.3    | 3.2      | 2.0        | 0.0       | 18.7   | 18.1    | 0.8      | 2.6      | 2.2        | 7.7     | 10.6    | 0.4          | 4.4    |
| 3      | 3.9     | 7.5    | 17.4    | 3.3      | 2.0        | 0.0       | 18.7   | 18.3    | 0.8      | 2.6      | 2.3        | 7.5     | 10.5    | 0.4          | 4.3    |
| 3.5    | 3.9     | 7.5    | 17.3    | 3.3      | 2.0        | 0.0       | 18.8   | 18.6    | 0.9      | 2.7      | 2.3        | 7.4     | 10.3    | 0.4          | 4.2    |
| 4      | 3.8     | 7.5    | 17.4    | 3.3      | 2.0        | 0.0       | 18.8   | 18.8    | 0.9      | 2.7      | 2.3        | 7.2     | 10.1    | 0.4          | 4.2    |
| 4.5    | 3.8     | 7.6    | 17.3    | 3.4      | 2.1        | 0.0       | 18.9   | 19.2    | 0.9      | 2.8      | 2.4        | 7.0     | 9.9     | 0.4          | 4.1    |
| 5      | 3.7     | 7.6    | 17.2    | 3.4      | 2.1        | 0.0       | 19.0   | 19.5    | 0.9      | 2.8      | 2.4        | 6.9     | 9.7     | 0.4          | 4.0    |
| 5.5    | 3.7     | 7.6    | 17.3    | 3.4      | 2.1        | 0.0       | 19.0   | 19.7    | 0.9      | 2.9      | 2.5        | 6.7     | 9.5     | 0.4          | 3.9    |
| 6      | 3.6     | 7.6    | 17.4    | 3.5      | 2.1        | 0.0       | 18.9   | 19.8    | 1.0      | 2.9      | 2.5        | 6.6     | 9.4     | 0.4          | 3.9    |



Table S4 Effects of time on stream on the product yield (wt%) in n-hexane catalytic cracking over HZSM-5 zeolites at 550 °C.

| TOS, h | Methane | Ethane | Propane | n-Butane | iso-Butane | n-Pentane | Ethene | Propene | 1-Butene | 2-Butene | iso-Butene | Benzene | Toluene | Ethylbenzene | Xylene |
|--------|---------|--------|---------|----------|------------|-----------|--------|---------|----------|----------|------------|---------|---------|--------------|--------|
| 0.5    | 4.4     | 7.1    | 17.8    | 3.2      | 2.0        | 0.0       | 16.7   | 15.5    | 0.7      | 2.2      | 1.9        | 8.5     | 12.1    | 0.5          | 5.1    |
| 1      | 3.9     | 7.2    | 17.6    | 3.2      | 2.1        | 0.0       | 17.6   | 16.7    | 0.7      | 2.4      | 2.1        | 7.7     | 11.0    | 0.4          | 4.6    |
| 1.5    | 3.9     | 7.2    | 17.1    | 3.1      | 2.0        | 0.0       | 18.1   | 17.2    | 0.8      | 2.4      | 2.1        | 7.7     | 10.7    | 0.4          | 4.4    |
| 2      | 3.9     | 7.3    | 17.1    | 3.2      | 2.0        | 0.0       | 18.0   | 17.4    | 0.8      | 2.5      | 2.1        | 7.6     | 10.6    | 0.4          | 4.4    |
| 2.5    | 3.9     | 7.3    | 16.9    | 3.2      | 2.0        | 0.0       | 18.3   | 17.7    | 0.8      | 2.5      | 2.2        | 7.5     | 10.4    | 0.4          | 4.3    |
| 3      | 3.8     | 7.3    | 16.9    | 3.2      | 2.0        | 0.0       | 18.2   | 17.8    | 0.8      | 2.6      | 2.2        | 7.3     | 10.2    | 0.4          | 4.2    |
| 3.5    | 3.8     | 7.3    | 16.8    | 3.2      | 2.0        | 0.0       | 18.2   | 18.0    | 0.8      | 2.6      | 2.2        | 7.2     | 10.0    | 0.4          | 4.1    |
| 4      | 3.7     | 7.3    | 16.8    | 3.2      | 2.0        | 0.0       | 18.2   | 18.2    | 0.8      | 2.7      | 2.3        | 7.0     | 9.8     | 0.4          | 4.0    |
| 4.5    | 3.7     | 7.3    | 16.7    | 3.3      | 2.0        | 0.0       | 18.3   | 18.5    | 0.9      | 2.7      | 2.3        | 6.8     | 9.5     | 0.4          | 3.9    |
| 5      | 3.6     | 7.3    | 16.6    | 3.3      | 2.0        | 0.0       | 18.3   | 18.8    | 0.9      | 2.7      | 2.4        | 6.6     | 9.3     | 0.4          | 3.8    |
| 5.5    | 3.5     | 7.3    | 16.6    | 3.3      | 2.0        | 0.0       | 18.2   | 18.9    | 0.9      | 2.8      | 2.4        | 6.5     | 9.1     | 0.4          | 3.8    |
| 6      | 3.5     | 7.3    | 16.7    | 3.3      | 2.1        | 0.0       | 18.1   | 19.0    | 0.9      | 2.8      | 2.4        | 6.3     | 9.0     | 0.4          | 3.7    |

Table S5 Effects of reaction temperature on the product selectivity (wt%) in 1-hexene catalytic cracking over HZSM-5 zeolites.

| T, °C | Methane | Ethane | Propane | n-Butane | iso-Butane | n-Pentane | Ethene | Propene | 1-Butene | 2-Butene | iso-Butene | Benzene | Toluene | Ethylbenzene | Xylene |
|-------|---------|--------|---------|----------|------------|-----------|--------|---------|----------|----------|------------|---------|---------|--------------|--------|
| 260   | 0.0     | 0.0    | 0.0     | 0.0      | 0.0        | 0.0       | 0.0    | 0.8     | 0.6      | 0.5      | 0.0        | 0.0     | 0.0     | 0.0          | 0.0    |
| 290   | 0.0     | 0.0    | 0.0     | 0.0      | 0.4        | 0.3       | 0.0    | 6.1     | 4.3      | 6.9      | 1.5        | 0.8     | 0.5     | 0.0          | 0.0    |
| 320   | 0.0     | 0.0    | 0.7     | 0.6      | 1.9        | 1.4       | 0.5    | 12.3    | 6.9      | 15.7     | 2.8        | 0.9     | 0.3     | 0.0          | 0.8    |
| 350   | 0.0     | 0.0    | 1.4     | 1.2      | 4.5        | 2.8       | 1.7    | 16.9    | 7.1      | 15.0     | 3.2        | 1.1     | 0.3     | 0.0          | 1.7    |
| 380   | 0.0     | 0.0    | 2.6     | 1.9      | 6.6        | 3.4       | 3.6    | 19.9    | 6.3      | 12.5     | 3.0        | 1.2     | 1.5     | 0.5          | 3.1    |
| 410   | 0.0     | 0.0    | 4.3     | 2.6      | 7.7        | 3.3       | 6.4    | 22.4    | 5.5      | 10.3     | 2.8        | 1.3     | 2.8     | 0.8          | 5.0    |
| 440   | 0.0     | 0.0    | 6.2     | 2.9      | 7.3        | 2.5       | 9.9    | 24.6    | 4.8      | 8.6      | 2.5        | 1.4     | 4.3     | 1.0          | 6.1    |
| 470   | 0.3     | 0.3    | 7.1     | 2.7      | 5.7        | 1.6       | 13.8   | 27.7    | 4.4      | 7.5      | 2.4        | 1.5     | 5.4     | 0.8          | 6.3    |
| 500   | 0.6     | 0.4    | 6.3     | 1.9      | 3.7        | 0.8       | 17.7   | 31.8    | 4.3      | 6.9      | 2.4        | 1.8     | 6.1     | 0.6          | 5.4    |

Table S6 Effects of reaction temperature on the product yield (wt%) in 1-hexene catalytic cracking over HZSM-5 zeolites.

| T, °C | Methane | Ethane | Propane | n-Butane | iso-Butane | n-Pentane | Ethene | Propene | 1-Butene | 2-Butene | iso-Butene | Benzene | Toluene | Ethylbenzene | Xylene |
|-------|---------|--------|---------|----------|------------|-----------|--------|---------|----------|----------|------------|---------|---------|--------------|--------|
| 260   | 0.0     | 0.0    | 0.0     | 0.0      | 0.0        | 0.0       | 0.0    | 0.7     | 0.6      | 0.4      | 0.0        | 0.0     | 0.0     | 0.0          | 0.0    |
| 290   | 0.0     | 0.0    | 0.0     | 0.0      | 0.4        | 0.3       | 0.0    | 5.8     | 4.0      | 6.5      | 1.4        | 0.8     | 0.4     | 0.0          | 0.0    |
| 320   | 0.0     | 0.0    | 0.6     | 0.6      | 1.9        | 1.4       | 0.5    | 12.1    | 6.8      | 15.5     | 2.7        | 0.9     | 0.3     | 0.0          | 0.7    |
| 350   | 0.0     | 0.0    | 1.4     | 1.2      | 4.4        | 2.7       | 1.6    | 16.7    | 7.0      | 14.9     | 3.1        | 1.1     | 0.3     | 0.0          | 1.7    |
| 380   | 0.0     | 0.0    | 2.6     | 1.9      | 6.6        | 3.4       | 3.6    | 19.9    | 6.3      | 12.5     | 3.0        | 1.2     | 1.5     | 0.5          | 3.1    |
| 410   | 0.0     | 0.0    | 4.3     | 2.6      | 7.7        | 3.2       | 6.4    | 22.3    | 5.5      | 10.3     | 2.7        | 1.3     | 2.8     | 0.8          | 5.0    |
| 440   | 0.0     | 0.0    | 6.2     | 2.9      | 7.3        | 2.5       | 9.9    | 24.6    | 4.8      | 8.6      | 2.5        | 1.4     | 4.3     | 1.0          | 6.1    |
| 470   | 0.3     | 0.3    | 7.1     | 2.7      | 5.7        | 1.6       | 13.8   | 27.7    | 4.4      | 7.5      | 2.4        | 1.5     | 5.4     | 0.8          | 6.3    |
| 500   | 0.6     | 0.4    | 6.3     | 1.9      | 3.7        | 0.8       | 17.7   | 31.8    | 4.3      | 6.9      | 2.4        | 1.8     | 6.1     | 0.6          | 5.4    |

Table S7 Effects of time on stream on the product selectivity (wt%) in 1-hexene catalytic cracking over HZSM-5 zeolites at 550 °C.

| TOS, h | Methane | Ethane | Propane | n-Butane | iso-Butane | n-Pentane | Ethene | Propene | 1-Butene | 2-Butene | iso-Butene | Benzene | Toluene | Ethylbenzene | Xylene |
|--------|---------|--------|---------|----------|------------|-----------|--------|---------|----------|----------|------------|---------|---------|--------------|--------|
| 0.5    | 3.3     | 1.1    | 7.5     | 1.4      | 2.2        | 0.0       | 18.7   | 15.9    | 1.3      | 2.0      | 0.7        | 13.0    | 20.5    | 0.8          | 9.1    |
| 1      | 3.1     | 1.0    | 6.9     | 1.3      | 2.0        | 0.0       | 19.8   | 17.0    | 1.4      | 2.1      | 0.8        | 12.9    | 19.2    | 0.8          | 9.0    |
| 1.5    | 3.0     | 1.0    | 6.6     | 1.2      | 1.9        | 0.0       | 20.3   | 17.8    | 1.5      | 2.2      | 0.8        | 12.8    | 18.9    | 0.8          | 8.7    |
| 2      | 3.0     | 1.0    | 6.8     | 1.3      | 2.1        | 0.0       | 20.7   | 18.8    | 1.6      | 2.4      | 0.9        | 12.3    | 18.1    | 0.7          | 7.8    |
| 2.5    | 2.8     | 0.9    | 6.2     | 1.2      | 1.9        | 0.0       | 21.2   | 19.6    | 1.6      | 2.5      | 0.9        | 11.9    | 17.7    | 0.8          | 8.2    |
| 3      | 2.7     | 0.9    | 6.2     | 1.2      | 2.1        | 0.0       | 21.6   | 20.7    | 1.8      | 2.7      | 1.0        | 11.4    | 16.7    | 0.7          | 7.8    |
| 3.5    | 2.6     | 0.8    | 6.1     | 1.2      | 2.1        | 0.0       | 21.7   | 21.5    | 1.8      | 2.8      | 1.1        | 10.9    | 16.5    | 0.7          | 7.6    |
| 4      | 2.5     | 0.8    | 6.1     | 1.2      | 2.2        | 0.0       | 21.8   | 22.3    | 1.9      | 3.0      | 1.2        | 10.3    | 15.6    | 0.7          | 7.2    |
| 4.5    | 2.4     | 0.8    | 5.9     | 1.2      | 2.2        | 0.0       | 22.1   | 23.3    | 2.0      | 3.1      | 1.2        | 9.7     | 14.8    | 0.7          | 7.1    |
| 5      | 2.2     | 0.7    | 5.5     | 1.1      | 2.1        | 0.0       | 22.1   | 24.1    | 2.1      | 3.2      | 1.3        | 9.6     | 15.1    | 0.7          | 7.2    |
| 5.5    | 2.2     | 0.7    | 5.7     | 1.2      | 2.2        | 0.0       | 22.2   | 24.9    | 2.3      | 3.4      | 1.4        | 9.0     | 14.0    | 0.6          | 6.6    |
| 6      | 2.0     | 0.6    | 5.2     | 1.1      | 2.0        | 0.0       | 22.1   | 25.7    | 2.3      | 3.5      | 1.4        | 8.9     | 14.1    | 0.6          | 6.7    |

Table S8 Effects of time on stream on the product yield (wt%) in 1-hexene catalytic cracking over HZSM-5 zeolites at 550 °C.

| TOS, h | Methane | Ethane | Propane | n-Butane | iso-Butane | n-Pentane | Ethene | Propene | 1-Butene | 2-Butene | iso-Butene | Benzene | Toluene | Ethylbenzene | Xylene |
|--------|---------|--------|---------|----------|------------|-----------|--------|---------|----------|----------|------------|---------|---------|--------------|--------|
| 0.5    | 3.3     | 1.1    | 7.5     | 1.4      | 2.2        | 0.0       | 18.7   | 15.9    | 1.3      | 2.0      | 0.7        | 13.0    | 20.5    | 0.8          | 9.1    |
| 1      | 3.1     | 1.0    | 6.9     | 1.3      | 2.0        | 0.0       | 19.8   | 17.0    | 1.4      | 2.1      | 0.8        | 12.9    | 19.2    | 0.8          | 9.0    |
| 1.5    | 3.0     | 1.0    | 6.6     | 1.2      | 1.9        | 0.0       | 20.3   | 17.8    | 1.5      | 2.2      | 0.8        | 12.8    | 18.9    | 0.8          | 8.7    |
| 2      | 3.0     | 1.0    | 6.8     | 1.3      | 2.1        | 0.0       | 20.7   | 18.8    | 1.6      | 2.4      | 0.9        | 12.3    | 18.1    | 0.7          | 7.8    |
| 2.5    | 2.8     | 0.9    | 6.2     | 1.2      | 1.9        | 0.0       | 21.2   | 19.6    | 1.6      | 2.5      | 0.9        | 11.9    | 17.7    | 0.8          | 8.2    |
| 3      | 2.7     | 0.9    | 6.2     | 1.2      | 2.1        | 0.0       | 21.6   | 20.7    | 1.8      | 2.7      | 1.0        | 11.4    | 16.7    | 0.7          | 7.8    |
| 3.5    | 2.6     | 0.8    | 6.1     | 1.2      | 2.1        | 0.0       | 21.7   | 21.5    | 1.8      | 2.8      | 1.1        | 10.9    | 16.5    | 0.7          | 7.6    |
| 4      | 2.5     | 0.8    | 6.1     | 1.2      | 2.2        | 0.0       | 21.8   | 22.3    | 1.9      | 3.0      | 1.2        | 10.3    | 15.6    | 0.7          | 7.2    |
| 4.5    | 2.4     | 0.8    | 5.9     | 1.2      | 2.2        | 0.0       | 22.1   | 23.3    | 2.0      | 3.1      | 1.2        | 9.7     | 14.8    | 0.7          | 7.1    |
| 5      | 2.2     | 0.7    | 5.5     | 1.1      | 2.1        | 0.0       | 22.1   | 24.1    | 2.1      | 3.2      | 1.3        | 9.6     | 15.1    | 0.7          | 7.2    |
| 5.5    | 2.2     | 0.7    | 5.7     | 1.2      | 2.2        | 0.0       | 22.2   | 24.9    | 2.3      | 3.4      | 1.4        | 9.0     | 14.0    | 0.6          | 6.6    |
| 6      | 2.0     | 0.6    | 5.2     | 1.1      | 2.0        | 0.0       | 22.1   | 25.7    | 2.3      | 3.5      | 1.4        | 8.9     | 14.1    | 0.6          | 6.7    |

Table S9 Effects of reaction temperature on the product selectivity (wt%) in cyclohexane catalytic cracking over HZSM-5 zeolites.

| T, °C | Methane | Ethane | Propane | n-Butane | iso-Butane | n-Pentane | Ethene | Propene | 1-Butene | 2-Butene | iso-Butene | Benzene | Toluene | Ethylbenzene | Xylene |
|-------|---------|--------|---------|----------|------------|-----------|--------|---------|----------|----------|------------|---------|---------|--------------|--------|
| 260   | NA      | NA     | NA      | NA       | NA         | NA        | NA     | NA      | NA       | NA       | NA         | NA      | NA      | NA           | NA     |
| 290   | NA      | NA     | NA      | NA       | NA         | NA        | NA     | NA      | NA       | NA       | NA         | NA      | NA      | NA           | NA     |
| 320   | NA      | NA     | NA      | NA       | NA         | NA        | NA     | NA      | NA       | NA       | NA         | NA      | NA      | NA           | NA     |
| 350   | 0.0     | 0.0    | 31.4    | 12.5     | 0.0        | 0.0       | 6.6    | 0.0     | 0.0      | 0.0      | 0.0        | 6.5     | 10.8    | 0.0          | 21.4   |
| 380   | 0.0     | 0.0    | 28.1    | 9.7      | 2.5        | 1.8       | 6.3    | 6.6     | 0.0      | 0.0      | 2.9        | 5.6     | 10.6    | 3.1          | 15.7   |
| 410   | 0.0     | 0.0    | 27.3    | 7.9      | 2.5        | 1.2       | 7.0    | 8.8     | 0.7      | 2.8      | 3.1        | 4.3     | 11.3    | 2.3          | 13.9   |
| 440   | 0.0     | 0.0    | 25.9    | 6.3      | 2.6        | 0.7       | 8.5    | 11.5    | 0.9      | 3.2      | 3.3        | 4.1     | 12.4    | 1.7          | 13.6   |
| 470   | 0.4     | 0.5    | 22.6    | 4.6      | 2.6        | 0.4       | 10.7   | 14.2    | 1.0      | 3.4      | 3.3        | 4.4     | 13.5    | 1.1          | 12.7   |
| 500   | 0.7     | 0.6    | 17.2    | 2.9      | 2.6        | 0.0       | 13.9   | 17.4    | 1.0      | 3.5      | 3.2        | 5.7     | 15.3    | 0.8          | 11.8   |

Table S10 Effects of reaction temperature on the product yield (wt%) in cyclohexane catalytic cracking over HZSM-5 zeolites.

| T, °C | Methane | Ethane | Propane | n-Butane | iso-Butane | n-Pentane | Ethene | Propene | 1-Butene | 2-Butene | iso-Butene | Benzene | Toluene | Ethylbenzene | Xylene |
|-------|---------|--------|---------|----------|------------|-----------|--------|---------|----------|----------|------------|---------|---------|--------------|--------|
| 260   | NA      | NA     | NA      | NA       | NA         | NA        | NA     | NA      | NA       | NA       | NA         | NA      | NA      | NA           | NA     |
| 290   | NA      | NA     | NA      | NA       | NA         | NA        | NA     | NA      | NA       | NA       | NA         | NA      | NA      | NA           | NA     |
| 320   | NA      | NA     | NA      | NA       | NA         | NA        | NA     | NA      | NA       | NA       | NA         | NA      | NA      | NA           | NA     |
| 350   | 0.0     | 0.0    | 1.2     | 0.5      | 0.0        | 0.0       | 0.2    | 0.0     | 0.0      | 0.0      | 0.0        | 0.2     | 0.4     | 0.0          | 0.8    |
| 380   | 0.0     | 0.0    | 3.8     | 1.3      | 0.3        | 0.2       | 0.8    | 0.9     | 0.0      | 0.0      | 0.4        | 0.7     | 1.4     | 0.4          | 2.1    |
| 410   | 0.0     | 0.0    | 8.4     | 2.4      | 0.8        | 0.4       | 2.1    | 2.7     | 0.2      | 0.9      | 1.0        | 1.3     | 3.5     | 0.7          | 4.3    |
| 440   | 0.0     | 0.0    | 13.5    | 3.3      | 1.4        | 0.4       | 4.4    | 6.0     | 0.5      | 1.7      | 1.7        | 2.1     | 6.5     | 0.9          | 7.1    |
| 470   | 0.2     | 0.3    | 15.6    | 3.2      | 1.8        | 0.3       | 7.4    | 9.8     | 0.7      | 2.3      | 2.3        | 3.0     | 9.3     | 0.8          | 8.8    |
| 500   | 0.6     | 0.5    | 13.6    | 2.3      | 2.0        | 0.0       | 10.9   | 13.7    | 0.8      | 2.7      | 2.5        | 4.5     | 12.1    | 0.6          | 9.3    |

Table S11 Effects of time on stream on the product selectivity (wt%) in cyclohexane catalytic cracking over HZSM-5 zeolites at 550 °C.

| TOS, h | Methane | Ethane | Propane | n-Butane | iso-Butane | n-Pentane | Ethene | Propene | 1-Butene | 2-Butene | iso-Butene | Benzene | Toluene | Ethylbenzene | Xylene |
|--------|---------|--------|---------|----------|------------|-----------|--------|---------|----------|----------|------------|---------|---------|--------------|--------|
| 0.5    | 2.1     | 0.6    | 9.4     | 1.3      | 1.9        | 0.0       | 14.5   | 14.1    | 0.6      | 2.0      | 1.7        | 19.2    | 19.7    | 1.0          | 10.0   |
| 1      | 1.8     | 0.5    | 8.3     | 1.2      | 1.9        | 0.0       | 15.3   | 15.9    | 0.7      | 2.2      | 1.9        | 20.0    | 18.2    | 1.0          | 9.3    |
| 1.5    | 1.7     | 0.5    | 7.6     | 1.1      | 1.9        | 0.0       | 15.6   | 17.3    | 0.8      | 2.4      | 2.1        | 20.6    | 16.9    | 1.0          | 9.0    |
| 2      | 1.6     | 0.4    | 7.0     | 1.0      | 1.8        | 0.0       | 15.5   | 18.3    | 0.8      | 2.6      | 2.3        | 21.1    | 16.2    | 1.0          | 8.6    |
| 2.5    | 1.6     | 0.4    | 6.8     | 1.0      | 1.8        | 0.0       | 15.6   | 19.6    | 0.9      | 2.8      | 2.4        | 20.8    | 15.5    | 0.9          | 8.3    |
| 3      | 1.5     | 0.4    | 6.6     | 1.0      | 1.8        | 0.0       | 15.5   | 20.7    | 1.0      | 3.1      | 2.6        | 20.5    | 14.7    | 0.9          | 8.0    |
| 3.5    | 1.4     | 0.3    | 6.3     | 0.9      | 1.8        | 0.0       | 15.3   | 21.9    | 1.1      | 3.3      | 2.8        | 20.2    | 14.2    | 0.9          | 8.0    |
| 4      | 1.3     | 0.3    | 6.0     | 0.9      | 1.7        | 0.0       | 15.0   | 23.4    | 1.2      | 3.5      | 3.1        | 20.0    | 13.5    | 0.9          | 7.9    |
| 4.5    | 1.3     | 0.0    | 5.7     | 0.8      | 1.6        | 0.0       | 14.8   | 24.8    | 1.3      | 3.7      | 3.3        | 19.9    | 12.8    | 0.8          | 7.7    |
| 5      | 1.2     | 0.0    | 5.6     | 0.8      | 1.5        | 0.0       | 14.4   | 25.8    | 1.4      | 4.0      | 3.4        | 19.9    | 12.0    | 0.8          | 7.3    |
| 5.5    | 1.2     | 0.0    | 5.5     | 0.8      | 1.4        | 0.0       | 14.1   | 26.8    | 1.4      | 4.1      | 3.6        | 19.6    | 11.6    | 0.8          | 7.2    |
| 6      | 1.1     | 0.0    | 5.0     | 0.7      | 1.3        | 0.0       | 13.6   | 28.2    | 1.5      | 4.3      | 3.8        | 20.0    | 10.5    | 0.8          | 7.4    |



Table S12 Effects of time on stream on the product yield (wt%) in cyclohexane catalytic cracking over HZSM-5 zeolites at 550 °C.

| TOS, h | Methane | Ethane | Propane | n-Butane | iso-Butane | n-Pentane | Ethene | Propene | 1-Butene | 2-Butene | iso-Butene | Benzene | Toluene | Ethylbenzene | Xylene |
|--------|---------|--------|---------|----------|------------|-----------|--------|---------|----------|----------|------------|---------|---------|--------------|--------|
| 0.5    | 2.0     | 0.6    | 8.9     | 1.2      | 1.8        | 0.0       | 13.8   | 13.4    | 0.6      | 1.9      | 1.6        | 18.3    | 18.7    | 0.9          | 9.5    |
| 1      | 1.7     | 0.5    | 7.7     | 1.1      | 1.8        | 0.0       | 14.3   | 14.8    | 0.6      | 2.1      | 1.8        | 18.7    | 17.0    | 0.9          | 8.7    |
| 1.5    | 1.6     | 0.4    | 6.9     | 1.0      | 1.7        | 0.0       | 14.3   | 15.8    | 0.7      | 2.2      | 1.9        | 18.8    | 15.5    | 0.9          | 8.2    |
| 2      | 1.5     | 0.4    | 6.3     | 0.9      | 1.6        | 0.0       | 13.9   | 16.4    | 0.7      | 2.3      | 2.0        | 18.9    | 14.5    | 0.9          | 7.7    |
| 2.5    | 1.4     | 0.3    | 5.9     | 0.8      | 1.6        | 0.0       | 13.5   | 17.0    | 0.8      | 2.5      | 2.1        | 18.1    | 13.5    | 0.8          | 7.2    |
| 3      | 1.3     | 0.3    | 5.5     | 0.8      | 1.5        | 0.0       | 13.0   | 17.4    | 0.8      | 2.6      | 2.2        | 17.2    | 12.3    | 0.8          | 6.7    |
| 3.5    | 1.1     | 0.3    | 5.1     | 0.7      | 1.4        | 0.0       | 12.3   | 17.7    | 0.9      | 2.6      | 2.3        | 16.3    | 11.4    | 0.7          | 6.4    |
| 4      | 1.0     | 0.2    | 4.6     | 0.7      | 1.3        | 0.0       | 11.6   | 18.0    | 0.9      | 2.7      | 2.4        | 15.4    | 10.4    | 0.7          | 6.1    |
| 4.5    | 0.9     | 0.0    | 4.2     | 0.6      | 1.2        | 0.0       | 10.8   | 18.2    | 0.9      | 2.7      | 2.4        | 14.6    | 9.4     | 0.6          | 5.6    |
| 5      | 0.8     | 0.0    | 3.9     | 0.6      | 1.0        | 0.0       | 10.0   | 17.9    | 0.9      | 2.7      | 2.4        | 13.8    | 8.3     | 0.6          | 5.1    |
| 5.5    | 0.8     | 0.0    | 3.6     | 0.5      | 0.9        | 0.0       | 9.2    | 17.4    | 0.9      | 2.7      | 2.4        | 12.7    | 7.5     | 0.5          | 4.7    |
| 6      | 0.7     | 0.0    | 3.1     | 0.4      | 0.8        | 0.0       | 8.4    | 17.3    | 0.9      | 2.6      | 2.3        | 12.3    | 6.5     | 0.5          | 4.5    |

Table S13 Effects of reaction temperature on the product selectivity (wt%) in cyclohexene catalytic cracking over HZSM-5 zeolites.

| T, °C | Methane | Ethane | Propane | n-Butane | iso-Butane | n-Pentane | Ethene | Propene | 1-Butene | 2-Butene | iso-Butene | Benzene | Toluene | Ethylbenzene | Xylene |
|-------|---------|--------|---------|----------|------------|-----------|--------|---------|----------|----------|------------|---------|---------|--------------|--------|
| 260   | 0.0     | 0.0    | 0.0     | 0.0      | 0.0        | 0.0       | 0.0    | 0.0     | 0.0      | 0.0      | 0.0        | 82.8    | 0.0     | 0.0          | 0.0    |
| 290   | 0.0     | 0.0    | 0.0     | 0.0      | 0.0        | 0.0       | 0.3    | 0.4     | 0.0      | 0.0      | 0.0        | 78.6    | 0.4     | 0.0          | 0.8    |
| 320   | 0.0     | 0.0    | 0.4     | 0.0      | 0.0        | 0.0       | 1.2    | 1.7     | 0.6      | 0.6      | 0.2        | 60.5    | 1.8     | 0.7          | 3.3    |
| 350   | 0.0     | 0.0    | 1.2     | 0.6      | 0.8        | 0.6       | 5.6    | 8.3     | 2.5      | 3.8      | 1.2        | 20.9    | 4.9     | 1.9          | 8.6    |
| 380   | 0.0     | 0.0    | 1.3     | 0.7      | 1.3        | 1.0       | 4.6    | 11.0    | 3.3      | 6.2      | 1.6        | 7.0     | 8.2     | 3.1          | 11.7   |
| 410   | 0.0     | 0.0    | 1.0     | 0.4      | 0.9        | 0.6       | 4.1    | 10.6    | 2.5      | 4.6      | 1.3        | 5.0     | 10.0    | 3.8          | 14.1   |
| 440   | 0.0     | 0.0    | 1.0     | 0.4      | 0.8        | 0.5       | 5.4    | 13.5    | 2.7      | 4.7      | 1.4        | 4.4     | 11.6    | 4.1          | 15.9   |
| 470   | 0.1     | 0.0    | 1.4     | 0.3      | 0.7        | 0.3       | 10.8   | 19.4    | 3.2      | 5.4      | 1.8        | 5.3     | 11.0    | 3.3          | 13.0   |
| 500   | 0.1     | 0.0    | 0.6     | 0.1      | 0.2        | 0.0       | 7.2    | 18.0    | 2.8      | 5.0      | 2.0        | 10.7    | 9.0     | 2.7          | 11.2   |

Table S14 Effects of reaction temperature on the product yield (wt%) in cyclohexene catalytic cracking over HZSM-5 zeolites.

| T, °C | Methane | Ethane | Propane | n-Butane | iso-Butane | n-Pentane | Ethene | Propene | 1-Butene | 2-Butene | iso-Butene | Benzene | Toluene | Ethylbenzene | Xylene |
|-------|---------|--------|---------|----------|------------|-----------|--------|---------|----------|----------|------------|---------|---------|--------------|--------|
| 260   | 0.0     | 0.0    | 0.0     | 0.0      | 0.0        | 0.0       | 0.0    | 0.0     | 0.0      | 0.0      | 0.0        | 39.6    | 0.0     | 0.0          | 0.0    |
| 290   | 0.0     | 0.0    | 0.0     | 0.0      | 0.0        | 0.0       | 0.3    | 0.4     | 0.0      | 0.0      | 0.0        | 70.4    | 0.4     | 0.0          | 0.7    |
| 320   | 0.0     | 0.0    | 0.3     | 0.0      | 0.0        | 0.0       | 1.2    | 1.6     | 0.6      | 0.5      | 0.1        | 56.4    | 1.7     | 0.7          | 3.1    |
| 350   | 0.0     | 0.0    | 1.2     | 0.5      | 0.8        | 0.6       | 5.5    | 8.1     | 2.4      | 3.8      | 1.2        | 20.4    | 4.8     | 1.9          | 8.4    |
| 380   | 0.0     | 0.0    | 1.3     | 0.7      | 1.3        | 1.0       | 4.5    | 10.9    | 3.2      | 6.2      | 1.6        | 7.0     | 8.1     | 3.0          | 11.6   |
| 410   | 0.0     | 0.0    | 1.0     | 0.4      | 0.9        | 0.6       | 4.1    | 10.5    | 2.5      | 4.6      | 1.3        | 5.0     | 10.0    | 3.8          | 14.1   |
| 440   | 0.0     | 0.0    | 1.0     | 0.4      | 0.8        | 0.5       | 5.4    | 13.4    | 2.7      | 4.7      | 1.4        | 4.4     | 11.6    | 4.1          | 15.9   |
| 470   | 0.1     | 0.0    | 1.4     | 0.3      | 0.7        | 0.3       | 10.7   | 19.3    | 3.2      | 5.3      | 1.8        | 5.3     | 10.9    | 3.3          | 13.0   |
| 500   | 0.1     | 0.0    | 0.6     | 0.1      | 0.2        | 0.0       | 7.1    | 17.8    | 2.7      | 5.0      | 2.0        | 10.5    | 8.9     | 2.6          | 11.1   |

Table S15 Effects of time on stream on the product selectivity (wt%) in cyclohexene catalytic cracking over HZSM-5 zeolites at 550 °C.

| TOS, h | Methane | Ethane | Propane | n-Butane | iso-Butane | n-Pentane | Ethene | Propene | 1-Butene | 2-Butene | iso-Butene | Benzene | Toluene | Ethylbenzene | Xylene |
|--------|---------|--------|---------|----------|------------|-----------|--------|---------|----------|----------|------------|---------|---------|--------------|--------|
| 0.5    | 0.5     | 1.3    | 0.4     | 2.9      | 0.6        | 1.0       | 0.0    | 15.6    | 13.0     | 1.0      | 1.5        | 0.6     | 15.0    | 27.7         | 0.7    |
| 1      | 1       | 1.2    | 0.4     | 2.3      | 0.5        | 0.9       | 0.0    | 16.1    | 14.6     | 1.2      | 1.8        | 0.7     | 14.6    | 25.8         | 0.8    |
| 1.5    | 1.5     | 1.0    | 0.3     | 1.7      | 0.4        | 0.8       | 0.0    | 16.0    | 17.2     | 1.8      | 2.6        | 1.0     | 13.5    | 23.1         | 1.0    |
| 2      | 2       | 0.7    | 0.0     | 0.7      | 0.0        | 0.3       | 0.0    | 11.3    | 14.2     | 1.8      | 2.7        | 1.2     | 17.1    | 17.1         | 1.6    |
| 2.5    | 2.5     | 0.4    | 0.0     | 0.0      | 0.0        | 0.0       | 0.0    | 4.5     | 6.8      | 1.3      | 1.8        | 1.0     | 33.0    | 6.3          | 1.4    |
| 3      | 3       | 0.3    | 0.0     | 0.0      | 0.0        | 0.0       | 0.0    | 2.1     | 3.1      | 0.7      | 0.9        | 0.6     | 44.1    | 1.7          | 0.5    |
| 3.5    | 3.5     | 0.2    | 0.0     | 0.0      | 0.0        | 0.0       | 0.0    | 1.5     | 2.1      | 0.5      | 0.6        | 0.4     | 49.5    | 1.2          | 0.3    |
| 4      | 4       | 0.0    | 0.0     | 0.0      | 0.0        | 0.0       | 0.0    | 1.1     | 1.4      | 0.4      | 0.4        | 0.3     | 51.8    | 0.8          | 0.2    |
| 4.5    | 4.5     | 0.0    | 0.0     | 0.0      | 0.0        | 0.0       | 0.0    | 1.4     | 1.9      | 0.4      | 0.5        | 0.3     | 51.5    | 0.7          | 0.0    |
| 5      | 5       | 0.0    | 0.0     | 0.0      | 0.0        | 0.0       | 0.0    | 0.8     | 1.0      | 0.0      | 0.3        | 0.0     | 55.1    | 0.5          | 0.0    |
| 5.5    | 5.5     | 0.0    | 0.0     | 0.0      | 0.0        | 0.0       | 0.0    | 0.9     | 1.1      | 0.0      | 0.3        | 0.0     | 55.7    | 0.6          | 0.0    |
| 6      | 6       | 0.0    | 0.0     | 0.0      | 0.0        | 0.0       | 0.0    | 0.5     | 0.6      | 0.0      | 0.0        | 0.0     | 55.4    | 0.5          | 0.0    |

Table S16 Effects of time on stream on the product yield (wt%) in cyclohexene catalytic cracking over HZSM-5 zeolites at 550 °C.

| TOS, h | Methane | Ethane | Propane | n-Butane | iso-Butane | n-Pentane | Ethene | Propene | 1-Butene | 2-Butene | iso-Butene | Benzene | Toluene | Ethylbenzene | Xylene |
|--------|---------|--------|---------|----------|------------|-----------|--------|---------|----------|----------|------------|---------|---------|--------------|--------|
| 0.5    | 1.3     | 0.4    | 2.9     | 0.6      | 1.0        | 0.0       | 15.6   | 13.0    | 1.0      | 1.5      | 0.6        | 15.0    | 27.7    | 0.7          | 14.8   |
| 1      | 1.2     | 0.4    | 2.3     | 0.5      | 0.9        | 0.0       | 16.1   | 14.6    | 1.2      | 1.8      | 0.7        | 14.6    | 25.8    | 0.8          | 14.7   |
| 1.5    | 1.0     | 0.3    | 1.7     | 0.4      | 0.8        | 0.0       | 16.0   | 17.2    | 1.8      | 2.6      | 1.0        | 13.5    | 23.1    | 1.0          | 13.6   |
| 2      | 0.7     | 0.0    | 0.7     | 0.0      | 0.3        | 0.0       | 11.2   | 14.1    | 1.8      | 2.7      | 1.2        | 17.0    | 17.0    | 1.6          | 12.3   |
| 2.5    | 0.4     | 0.0    | 0.0     | 0.0      | 0.0        | 0.0       | 4.4    | 6.5     | 1.2      | 1.7      | 0.9        | 31.9    | 6.1     | 1.3          | 6.2    |
| 3      | 0.3     | 0.0    | 0.0     | 0.0      | 0.0        | 0.0       | 2.0    | 2.9     | 0.7      | 0.9      | 0.5        | 42.1    | 1.6     | 0.5          | 2.3    |
| 3.5    | 0.2     | 0.0    | 0.0     | 0.0      | 0.0        | 0.0       | 1.4    | 2.0     | 0.4      | 0.6      | 0.3        | 46.8    | 1.1     | 0.3          | 1.3    |
| 4      | 0.0     | 0.0    | 0.0     | 0.0      | 0.0        | 0.0       | 1.0    | 1.3     | 0.3      | 0.4      | 0.3        | 49.0    | 0.7     | 0.2          | 0.9    |
| 4.5    | 0.0     | 0.0    | 0.0     | 0.0      | 0.0        | 0.0       | 1.3    | 1.8     | 0.4      | 0.5      | 0.3        | 48.7    | 0.7     | 0.0          | 0.9    |
| 5      | 0.0     | 0.0    | 0.0     | 0.0      | 0.0        | 0.0       | 0.7    | 0.9     | 0.0      | 0.3      | 0.0        | 51.9    | 0.5     | 0.0          | 0.6    |
| 5.5    | 0.0     | 0.0    | 0.0     | 0.0      | 0.0        | 0.0       | 0.8    | 1.0     | 0.0      | 0.3      | 0.0        | 52.3    | 0.6     | 0.0          | 0.7    |
| 6      | 0.0     | 0.0    | 0.0     | 0.0      | 0.0        | 0.0       | 0.5    | 0.6     | 0.0      | 0.0      | 0.0        | 52.1    | 0.5     | 0.0          | 0.6    |
